# Supplementary material for: Contamination of Zearalenone from China in 2019 by a Visual and Digitized Immunochromatographic Assay
Source: PubMed Central journal article supplement (PMC7472730; doi:10.3390/toxins12080521), 2020-08-14
Supplement: toxins-12-00521-s001.pdf [file toxins-12-00521-s001.pdf]

# Supplementary Materials: Contamination of Zearalenone from China in 2019 by a Visual and Digitized Immunochromatographic Assay

Xia Hong, Yuhao Mao, Chuqin Yang, Zhenjiang Liu, Ming Li and Daolin Du

Table S1. The parameters of ELISA and ICA for ZEN.

| Immunoassay | Detection Method  | LOD (ng/mL) | Detection Range (ng/mL) | Detection Step | Detection Time (min) |
|-------------|-------------------|-------------|-------------------------|----------------|----------------------|
| ELISA       | Microplate reader | 0.20        | 0.20–5.4                | 5              | 180                  |
| ICA         | Naked eye         | 0.50        | 0.50–3.0                | 1              | 5                    |
|             | Strip reader      | 0.25        | 0.25–4.0                | 1              | 5                    |

**Table S2.** The ZEN-positive levels in the authentic samples from China in 2019.

| Sample | Quantitative ICA (ng/g, n = 3) | LC-MS/MS (ng/g, n = 3) | Sample           | Quantitative ICA (ng/g, n = 3) | LC-MS/MS (ng/g, n = 3) | Sample           | Quantitative ICA (ng/g, n = 3) | LC-MS/MS (ng/g, n = 3) |
|--------|--------------------------------|------------------------|------------------|--------------------------------|------------------------|------------------|--------------------------------|------------------------|
| Corn   | 3.2                            | 2.9                    | Wheat flour      | 9.5                            | 12.6                   | Corn gluten      | 76.9                           | 96.6                   |
| Corn   | 3.5                            | 2.8                    | Wheat flour      | 10.6                           | 6.3                    | Soybean meal     | 84.2                           | 76.1                   |
| Corn   | 6.2                            | 5.7                    | Wheat flour      | 10.6                           | 14.2                   | Soybean meal     | 120.3                          | 129.6                  |
| Corn   | 7.4                            | 9.9                    | Wheat flour      | 10.7                           | 12.1                   | Peanut meal      | 121.2                          | 128.4                  |
| Corn   | 7.5                            | 9.0                    | Wheat flour      | 11.2                           | 6.8                    | Peanut meal      | 132.9                          | 139.3                  |
| Corn   | 7.9                            | 8.0                    | Wheat flour      | 11.7                           | 7.6                    | Rice bran meal   | 148.6                          | 144.0                  |
| Corn   | 8.6                            | 9.9                    | Wheat flour      | 12.4                           | 11.6                   | Corn gluten meal | 153.3                          | 186.4                  |
| Corn   | 8.8                            | 10.8                   | Wheat flour      | 13.9                           | 9.0                    | Rice bran meal   | 208.6                          | 249.5                  |
| Corn   | 8.9                            | 9.8                    | Wheat flour      | 14.7                           | 10.5                   | Rice bran meal   | 208.6                          | 187.7                  |
| Corn   | 9.9                            | 11.8                   | Wheat flour      | 14.7                           | 16.2                   | Rice bran meal   | 229.1                          | 143.7                  |
| Corn   | 10.0                           | 9.7                    | Wheat flour      | 20.1                           | 20.7                   | Peanut meal      | 263.1                          | 279.2                  |
| Corn   | 10.2                           | 12.8                   | Wheat flour      | 20.4                           | 25.0                   | Corn gluten meal | 477.7                          | 548.5                  |
| Corn   | 11.5                           | 12.6                   | Wheat flour      | 21.3                           | 17.3                   | Corn gluten      | 677.7                          | 598.6                  |
| Corn   | 12.0                           | 19.3                   | Corn gluten meal | 2.7                            | 3.2                    | Feed             | 7.2                            | 6.3                    |
| Corn   | 12.6                           | 13.3                   | Corn gluten      | 3.1                            | 3.7                    | Feed             | 11.3                           | 10.9                   |
| Corn   | 13.9                           | 15.3                   | Corn gluten meal | 3.1                            | 3.6                    | Feed             | 16.7                           | 15.3                   |
| Corn   | 14.6                           | 14.9                   | Corn gluten      | 5.6                            | 4.5                    | Feed             | 20.3                           | 23.5                   |
| Corn   | 15.1                           | 12.6                   | Soybean meal     | 11.4                           | 11.3                   | Feed             | 24.7                           | 24.0                   |
| Corn   | 15.6                           | 17.0                   | Soybean meal     | 11.4                           | 12.3                   | Feed             | 28.8                           | 29.0                   |
| Corn   | 16.7                           | 18.9                   | Corn gluten meal | 12.5                           | 12.8                   | Feed             | 35.4                           | 35.5                   |
| Corn   | 18.4                           | 19.2                   | Corn gluten meal | 13.2                           | 16.3                   | Feed             | 42.7                           | 43.3                   |
| Corn   | 19.4                           | 17.6                   | Corn gluten      | 16.3                           | 14.7                   | Feed             | 47.8                           | 52.9                   |
| Corn   | 25.3                           | 22.9                   | Corn gluten meal | 19.4                           | 36.4                   | Feed             | 59.6                           | 56.8                   |
| Corn   | 25.9                           | 31.9                   | Corn gluten      | 21.0                           | 21.3                   | DDGS             | 63.0                           | 77.7                   |
| Corn   | 35.7                           | 38.9                   | Corn gluten meal | 22.5                           | 20.4                   | DDGS             | 70.4                           | 117.8                  |
| Corn   | 54.2                           | 47.9                   | Corn gluten meal | 27.2                           | 26.4                   | Feed             | 77.3                           | 71.8                   |
| Corn   | 184.4                          | 247.9                  | Corn gluten meal | 28.1                           | 25.5                   | Feed             | 77.3                           | 93.5                   |
| Corn   | 743.2                          | 750.5                  | Corn gluten      | 35.5                           | 36.5                   | Feed             | 91.8                           | 83.0                   |
| Wheat  | 3.0                            | 3.9                    | Peanut meal      | 36.9                           | 36.4                   | Feed             | 151.5                          | 132.4                  |

|             |       |       |                  |      |      |      |       |       |
|-------------|-------|-------|------------------|------|------|------|-------|-------|
| Wheat       | 4.3   | 3.8   | Peanut meal      | 41.7 | 47.6 | DDGS | 153.9 | 158.9 |
| Wheat       | 6.3   | 7.1   | Corn gluten      | 42.5 | 35.4 | Feed | 163.0 | 119.1 |
| Wheat       | 7.0   | 8.0   | Peanut meal      | 45.7 | 59.9 | Feed | 184.0 | 196.5 |
| Wheat       | 15.5  | 12.8  | Corn germ        | 52.4 | 49.1 | Feed | 196.0 | 184.7 |
| Wheat       | 36.4  | 49.8  | Corn germ        | 56.7 | 56.5 | DDGS | 202.9 | 290.0 |
| Wheat       | 117.5 | 123.3 | Corn gluten meal | 60.7 | 72.6 | DDGS | 245.7 | 205.5 |
| Wheat flour | 6.8   | 6.4   | Corn gluten meal | 65.4 | 69.1 | Feed | 526.8 | 497.4 |
| Wheat flour | 7.1   | 8.9   | Corn germ        | 67.2 | 73.4 | Feed | 567.0 | 497.0 |
| Wheat flour | 7.2   | 4.4   | Corn germ        | 67.2 | 74.3 | Feed | 567.0 | 526.3 |
| Wheat flour | 8.6   | 7.2   | Corn germ        | 67.4 | 69.4 | Feed | 867.0 | 761.7 |

**Table S3.** The information of the authentic samples from China in 2019.

| Number | Province | Sample      | Number | Province | Sample           | Number | Province | Sample           |
|--------|----------|-------------|--------|----------|------------------|--------|----------|------------------|
| 1      | Jiangsu  | Corn        | 33     | Jiangsu  | Corn germ        | 65     | Anhui    | DDGS             |
| 2      | Jiangsu  | Corn        | 34     | Jiangsu  | Corn germ        | 66     | Anhui    | DDGS             |
| 3      | Jiangsu  | Corn        | 35     | Jiangsu  | Corn germ        | 67     | Shandong | Corn             |
| 4      | Jiangsu  | Corn        | 36     | Jiangsu  | Corn gluten      | 68     | Shandong | Corn             |
| 5      | Jiangsu  | Corn        | 37     | Jiangsu  | Corn gluten      | 69     | Shandong | Corn             |
| 6      | Jiangsu  | Corn        | 38     | Jiangsu  | Corn gluten      | 70     | Shandong | Corn             |
| 7      | Jiangsu  | Corn        | 39     | Jiangsu  | Corn gluten      | 71     | Shandong | Corn             |
| 8      | Jiangsu  | Corn        | 40     | Jiangsu  | Corn gluten meal | 72     | Shandong | Wheat            |
| 9      | Jiangsu  | Corn        | 41     | Jiangsu  | Peanut meal      | 73     | Shandong | Wheat            |
| 10     | Jiangsu  | Wheat       | 42     | Jiangsu  | Peanut meal      | 74     | Shandong | Wheat            |
| 11     | Jiangsu  | Wheat       | 43     | Jiangsu  | Peanut meal      | 75     | Shandong | Wheat            |
| 12     | Jiangsu  | Wheat       | 44     | Jiangsu  | Feed             | 76     | Shandong | Wheat flour      |
| 13     | Jiangsu  | Wheat       | 45     | Jiangsu  | Feed             | 77     | Shandong | Wheat flour      |
| 14     | Jiangsu  | Wheat       | 46     | Jiangsu  | DDGS             | 78     | Shandong | Corn gluten meal |
| 15     | Jiangsu  | Wheat       | 47     | Jiangsu  | DDGS             | 79     | Shandong | Corn gluten meal |
| 16     | Jiangsu  | Wheat       | 48     | Jiangsu  | DDGS             | 80     | Shandong | Corn germ        |
| 17     | Jiangsu  | Wheat       | 49     | Anhui    | Corn             | 81     | Shandong | Corn gluten      |
| 18     | Jiangsu  | Wheat flour | 50     | Anhui    | Wheat flour      | 82     | Shandong | Corn gluten      |
| 19     | Jiangsu  | Wheat flour | 51     | Anhui    | Wheat flour      | 83     | Shandong | Rice bran meal   |
| 20     | Jiangsu  | Wheat flour | 52     | Anhui    | Corn germ        | 84     | Shandong | Rice bran meal   |
| 21     | Jiangsu  | Wheat flour | 53     | Anhui    | Corn germ        | 85     | Shandong | Soybean meal     |
| 22     | Jiangsu  | Wheat flour | 54     | Anhui    | Corn germ        | 86     | Shandong | Feed             |
| 23     | Jiangsu  | Wheat flour | 55     | Anhui    | Rice bran meal   | 87     | Hebei    | Corn             |
| 24     | Jiangsu  | Wheat flour | 56     | Anhui    | Rice bran meal   | 88     | Hebei    | Corn             |
| 25     | Jiangsu  | Wheat flour | 57     | Anhui    | Peanut meal      | 89     | Hebei    | Corn             |
| 26     | Jiangsu  | Wheat flour | 58     | Anhui    | Peanut meal      | 90     | Hebei    | Corn             |
| 27     | Jiangsu  | Wheat flour | 59     | Anhui    | Peanut meal      | 91     | Hebei    | Corn             |
| 28     | Jiangsu  | Wheat flour | 60     | Anhui    | Peanut meal      | 92     | Hebei    | Wheat flour      |
| 29     | Jiangsu  | Wheat flour | 61     | Anhui    | Soybean meal     | 93     | Hebei    | Wheat flour      |
| 30     | Jiangsu  | Wheat flour | 62     | Anhui    | Soybean meal     | 94     | Hebei    | Wheat flour      |
| 31     | Jiangsu  | Wheat flour | 63     | Anhui    | Feed             | 95     | Henan    | Corn             |

|    |         |             |    |       |      |    |       |      |
|----|---------|-------------|----|-------|------|----|-------|------|
| 32 | Jiangsu | Wheat flour | 64 | Anhui | DDGS | 96 | Henan | Corn |
|----|---------|-------------|----|-------|------|----|-------|------|

**Table S4.** The information of the authentic samples from China in 2019.

| Number | Province  | Sample       | Number | Province     | Sample           | Number | Province | Sample           |
|--------|-----------|--------------|--------|--------------|------------------|--------|----------|------------------|
| 97     | Henan     | Corn         | 128    | Liaoning     | Wheat flour      | 159    | Jiangxi  | Corn             |
| 98     | Henan     | Corn         | 129    | Liaoning     | Wheat flour      | 160    | Jiangxi  | Corn germ        |
| 99     | Henan     | Wheat        | 130    | Liaoning     | Wheat flour      | 161    | Zhejiang | Corn             |
| 100    | Henan     | Wheat        | 131    | Liaoning     | Wheat flour      | 162    | Zhejiang | Corn             |
| 101    | Henan     | Wheat        | 132    | Liaoning     | Corn gluten meal | 163    | Zhejiang | Wheat flour      |
| 102    | Henan     | Wheat        | 133    | Liaoning     | Soybean meal     | 164    | Zhejiang | Corn germ        |
| 103    | Henan     | Feed         | 134    | Liaoning     | Peanut meal      | 165    | Zhejiang | Corn gluten meal |
| 104    | Henan     | Feed         | 135    | Liaoning     | Feed             | 166    | Zhejiang | Rice bran meal   |
| 105    | Henan     | Feed         | 136    | Liaoning     | Feed             | 167    | Zhejiang | Soybean meal     |
| 106    | Neimenggu | Corn         | 137    | Liaoning     | Feed             | 168    | Zhejiang | Feed             |
| 107    | Neimenggu | Corn         | 138    | Liaoning     | Feed             | 169    | Zhejiang | Feed             |
| 108    | Neimenggu | Corn         | 139    | Liaoning     | DDGS             | 170    | Zhejiang | Feed             |
| 109    | Neimenggu | Wheat        | 140    | Liaoning     | Wheat flour      | 171    | Zhejiang | Feed             |
| 110    | Neimenggu | Wheat        | 141    | Heilongjiang | Corn             | 172    | Hunan    | Wheat flour      |
| 111    | Neimenggu | Wheat flour  | 142    | Heilongjiang | Wheat            | 173    | Hunan    | Wheat flour      |
| 112    | Neimenggu | Wheat flour  | 143    | Heilongjiang | Corn germ        | 174    | Hunan    | Wheat flour      |
| 113    | Neimenggu | Wheat flour  | 144    | Heilongjiang | Feed             | 175    | Hunan    | Wheat flour      |
| 114    | Neimenggu | Wheat flour  | 145    | Heilongjiang | Feed             | 176    | Hunan    | Corn germ        |
| 115    | Neimenggu | Corn germ    | 146    | Heilongjiang | Feed             | 177    | Hunan    | Corn germ        |
| 116    | Neimenggu | Peanut meal  | 147    | Heilongjiang | DDGS             | 178    | Hunan    | Corn gluten meal |
| 117    | Neimenggu | Soybean meal | 148    | Heilongjiang | DDGS             | 179    | Hunan    | Corn gluten meal |
| 118    | Neimenggu | Feed         | 149    | Heilongjiang | DDGS             | 180    | Hunan    | Rice bran meal   |
| 119    | Neimenggu | Feed         | 150    | Jiangxi      | Corn             | 181    | Sichuan  | Wheat flour      |
| 120    | Neimenggu | Feed         | 151    | Jiangxi      | Corn             | 182    | Sichuan  | Wheat flour      |
| 121    | Neimenggu | Feed         | 152    | Jiangxi      | Corn             | 183    | Sichuan  | Wheat flour      |
| 122    | Neimenggu | Feed         | 153    | Jiangxi      | Corn             | 184    | Sichuan  | Corn gluten meal |
| 123    | Neimenggu | Feed         | 154    | Jiangxi      | Corn             | 185    | Sichuan  | Feed             |
| 124    | Neimenggu | Feed         | 155    | Jiangxi      | Corn             | 186    | Guangxi  | Corn gluten meal |
| 125    | Neimenggu | Feed         | 156    | Jiangxi      | Corn             | 187    | Guangxi  | Feed             |

|     |           |             |     |         |      |
|-----|-----------|-------------|-----|---------|------|
| 126 | Neimenggu | Feed        | 157 | Jiangxi | Corn |
| 127 | Liaoning  | Wheat flour | 158 | Jiangxi | Corn |

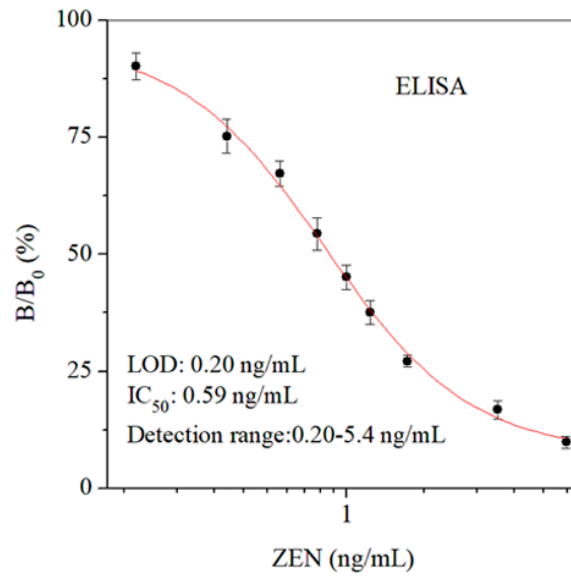

**Figure S1.** The standard curve of ELISA for ZEN.

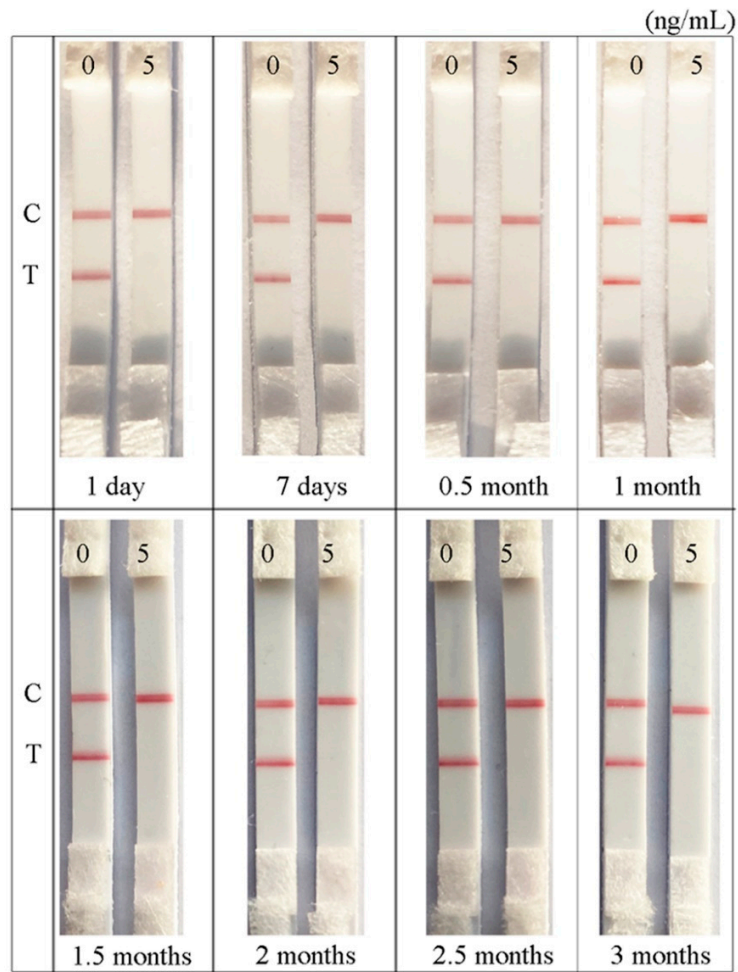

**Figure S2.** The stability and sensitivity tests of the ICA strip for ZEN in the storage of 3 months.

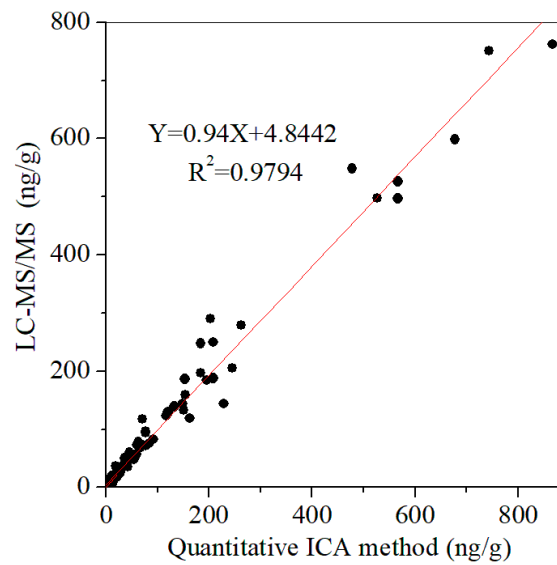

**Figure S3.** The correlation between the quantitative ICA and LC-MS/MS for ZEN in the authentic samples.
